# Supplementary material for: An Extensive Meta-Metagenomic Search Identifies SARS-CoV-2-Homologous Sequences in Pangolin Lung Viromes
Source: PubMed Central journal article supplement (PMC7203451; doi:10.1128/msphere.00160-20), 2020-05-06
Supplement: mSphere.00160-20-sf002.pdf [file mSphere.00160-20-sf002.pdf]

Human AGAGTCCAACCAACAGAATCTATTGTTAGATTTCCCTAATATTACAAACTTGTGCCCTTTTGGTGAAGTTTTTAACGCCACCACATTTCGCATCAGTTTATGCTTGGAACAGAAAGAGAATT  
RaTG13 AGAGTCCAACCAACAGATCTATTGTTAGATTTCCAAATATTACAAACTTATGTCCTTTTGGTGAAGTTTTTAACGCCACCAGATTTCATCTGTTTATGCTTGGAACAGGAAGAGAATC  
Pangolin AGAGTCAACCAACTGAATCTATAGTTAGTTTCCAAATATTACAAACTTATGCCCTTTTGGTGAAGTTTTCAATGCAACCACTTTTCATCTGTTTATGCTTGGAAATAGAAAGAGAATC  
\*\*\*\*\*  
Amino acid coordinates | 319 | 358

Human AGCAACTGTGTTGCTGATTATTCTGTCCCTATATAATTCCGCATCATTTTCCACTTTTAAGTGTATGGAGTGTCTCCTACTAAATTAATGATCTCTGCTTTACTAATGTCTATGCAGAT  
RaTG13 AGCAACTGTGTTGCTGATTACTCTGTCCCTATATAATTCCACTTCATTTCTTACCTTTAAATGTTATGGAGTGTCTCCTACTAAATTAATGATCTCTGCTTTACTAATGTTTATGCAGAC  
Pangolin AGTAACTGTGTTGCTGATTACTCTGTCTTTCAACTCCACTTCCTTCTCAACATTCAAATGTTATGGAGTTTCAACCAACCAAATAAATGATCTCTGCTTTACTAATGTTTATGCAGAC  
\*\*  
Amino acid coordinates | 359 | 398

Human TCATTTGTAATTAGAGGTGATGAAGTCAGACAAATCGCTCCAGGGCAAACCTGGAAAGATTGCTGATTATAATTATAAATTACCAGATGATTTTACAGGCTGCGTTATAGCTTGGAAATCT  
RaTG13 TCATTTGTGATTAAGGTGATGAAGTCAGACAAATTCGCCAGGACAAACCTGGAAAGATTGCTGACTACAATTATAAACTACCAGATGATTTTACTGGTTGTGTTATAGCTTGGAAATCT  
Pangolin TCATTTGTAGTTAGAGGTGATGAAGTCAGACAAATTCGCTCCAGGACAAACAGGAAGATTGCTGACTATAATTATAAACTCCCTGATGATTTACAGGTTGTGTAATAGCTTGGAAATCT  
\*\*\*\*\*  
Amino acid coordinates | 399 | 438

Human AACAACTTGATTCTAAGGTTGGTGGTAATTATAATTACCTGTATAGATTGTTTAGGAAGTCTAATCTCAAACCTTTGAGAGAGATATTTCAACTGAAATCTATCAGGCCGGTAGCACA  
RaTG13 AAGCATAATTGATGCAAAAGAGGGCGGTAATTTAACTATCTTTACCGTCTCTTTAGAAAAGCTAATCTTAAACCCTTTGAGAGGGATATCTCAACTGAAATTTACCAAGCAGGCAGCAAA  
Pangolin AACAACTTGATTCTAAGGTTGGTGGTAATTATAACTACCTTTATAGATTGTTTAGAAAGTCCAACCTCAAACCTTTGAAACGAGACATTTCTACAGAAATATACCAAGCTGGTAGTACA  
\*\* \* \*\*\*\*\* \* \* \* \* \*  
Amino acid coordinates | 439 | 478

Human CCTTGTAATGGTGTGAAGGTTTTAATTGTTACTTTCCCTTACAATCATATGGTTTTCCAACCCACTAATGGTGTGGTTACCAACCATAACAGAGTAGTAGTACTTTCTTTTGAACCTTCTA  
RaTG13 CCTTGTAATGGTCAAACCTGGTCTAAATTGCTACTTACCACCTTTATAGATATGGATTTTACCCTACTGATGGTGTGGTACCAACCTTATAGGTTAGTAGTACTTTCTTTTGAACCTTCTA  
Pangolin CCTGCAATGGGTTGAAGGTTTTAACGTGTTACTTTCCCTTACAATCTTATGGTTTTCCACCTACTAATGGTGTGGTTACCAACCTTATAGAGTAGTAGTATTGTCATTTGAACCTTTA  
\*\* \* \*\*\*\*\* \* \* \* \* \*  
Amino acid coordinates | 479 | 518

Human CATGCACCAGCAACTGTTTGTGGACCTAAAAAGTCTACTAATTTGGTTAAAAACAAATGTGTCAATTTTC  
RaTG13 AATGCACCAGCAACTGTTTGTGGACCTAAGAAGTCTACTAACCTTGGTTAAAAATAAATGTGTCAATTTTC  
Pangolin AATGCACCTGCTACTGTTTGTGGACCTAAACAGTCCACTAACCTAGTTAAAAACAAATGTGTCAACTTTC  
\*\*\*\*\* \* \* \* \* \*  
Amino acid coordinates | 519 | 541
