# Supplementary material for: An Extensive Meta-Metagenomic Search Identifies SARS-CoV-2-Homologous Sequences in Pangolin Lung Viromes
Source: PubMed Central journal article supplement (PMC7203451; doi:10.1128/msphere.00160-20), 2020-05-06
Supplement: mSphere.00160-20-sf003.pdf [file mSphere.00160-20-sf003.pdf]

## Inferred Variation: Windowed Average (Full Virus)

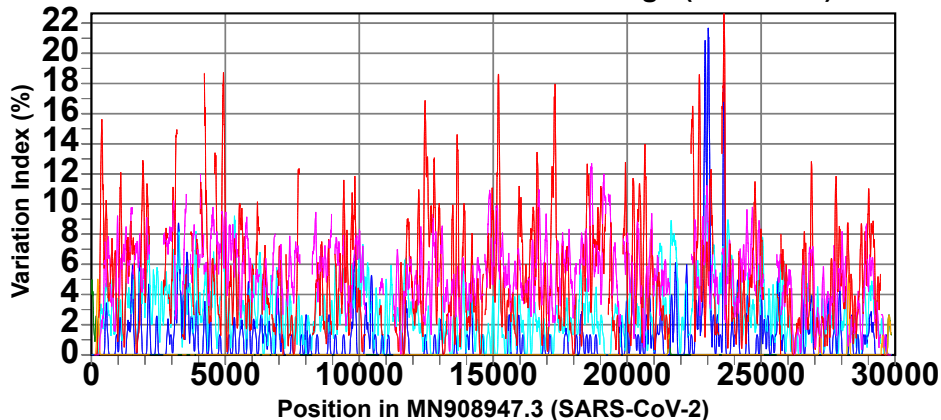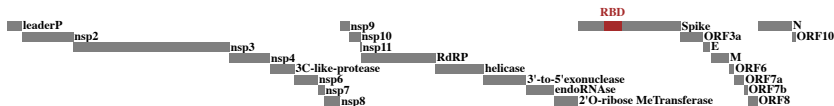

## Inferred Variation: Windowed Average (Zoomed Spike Region)

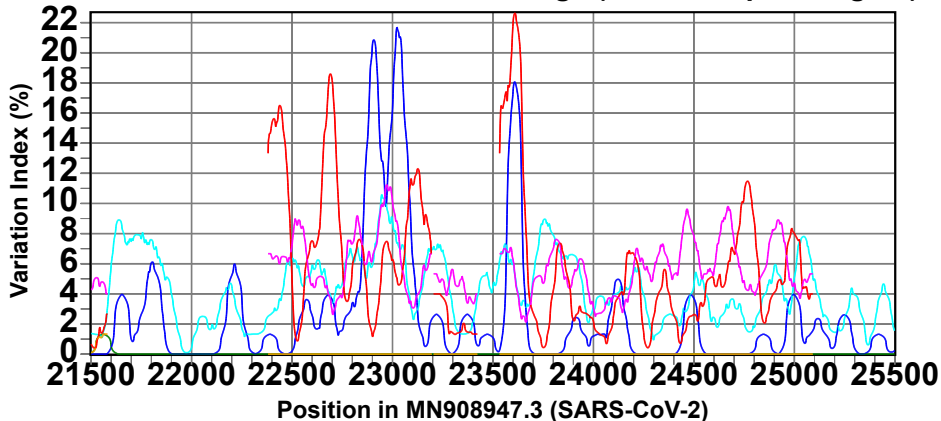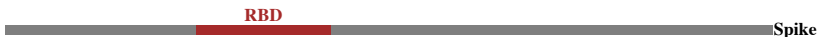

- Non-Synonymous: RaTG13 [Bat]
- Synonymous: RaTG13 [Bat]
- Non-Coding: RaTG13 [Bat]
- Non-Synonymous: SRR10168376/7/8 Read-Aggregate [Pangolin]
- Synonymous: SRR10168376/7/8 Read-Aggregate [Pangolin]
- Non-Coding: SRR10168376/7/8 Read-Aggregate [Pangolin]
