# Supplementary material for: An Extensive Meta-Metagenomic Search Identifies SARS-CoV-2-Homologous Sequences in Pangolin Lung Viromes
Source: PubMed Central journal article supplement (PMC7203451; doi:10.1128/msphere.00160-20), 2020-05-06

**A.**

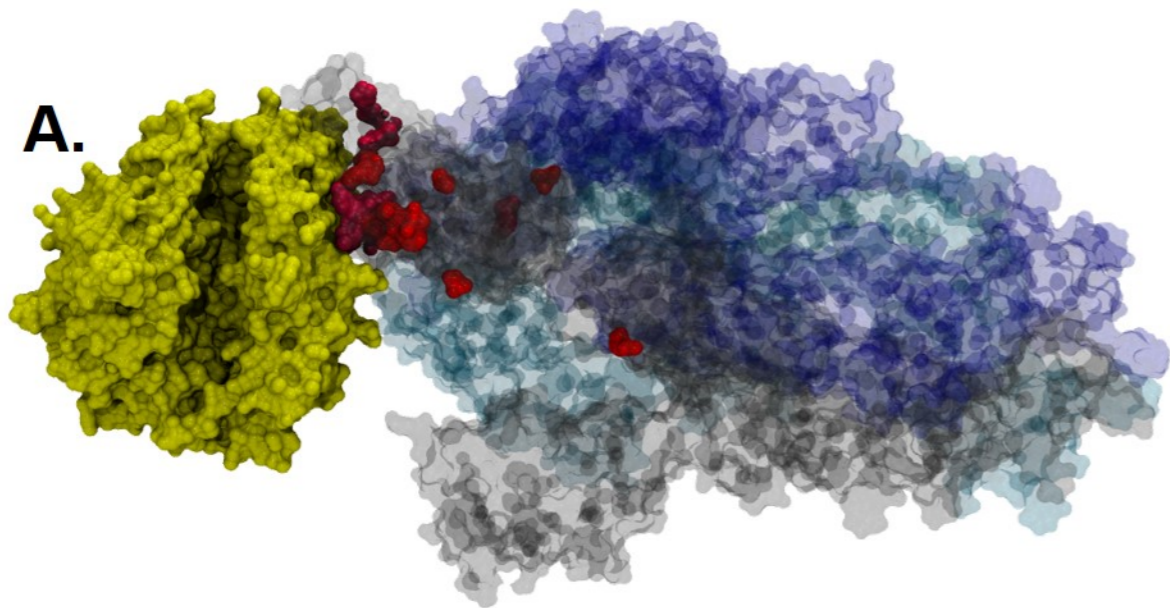

**B.**

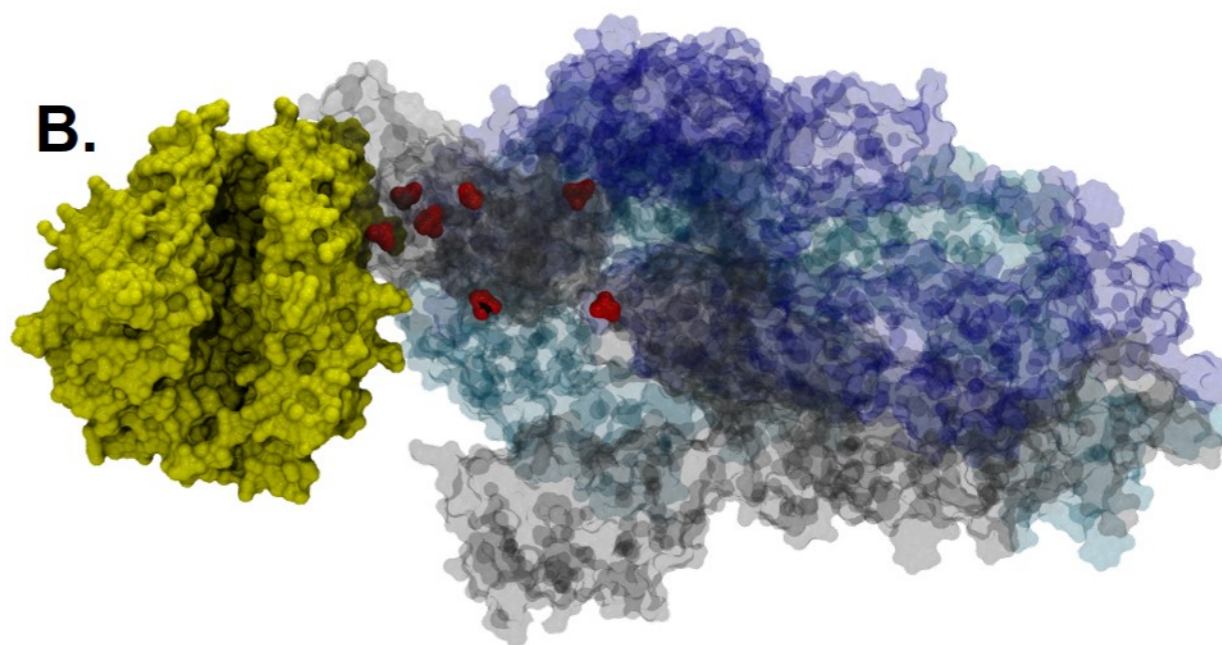

  
Right-handed 60°

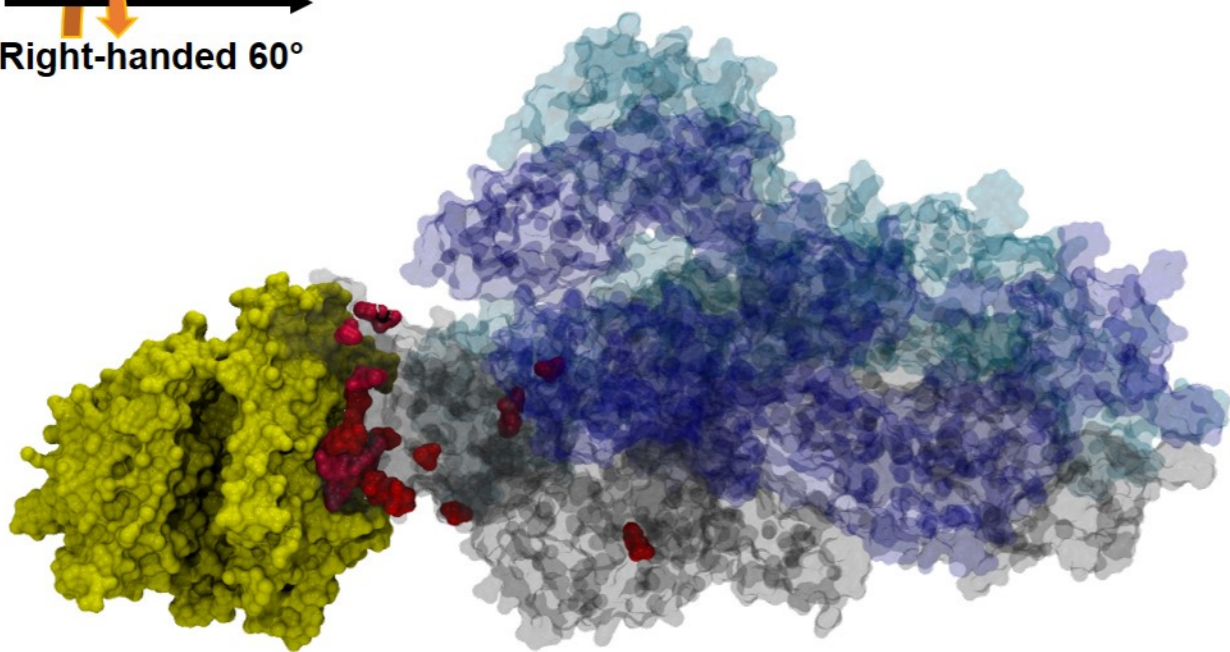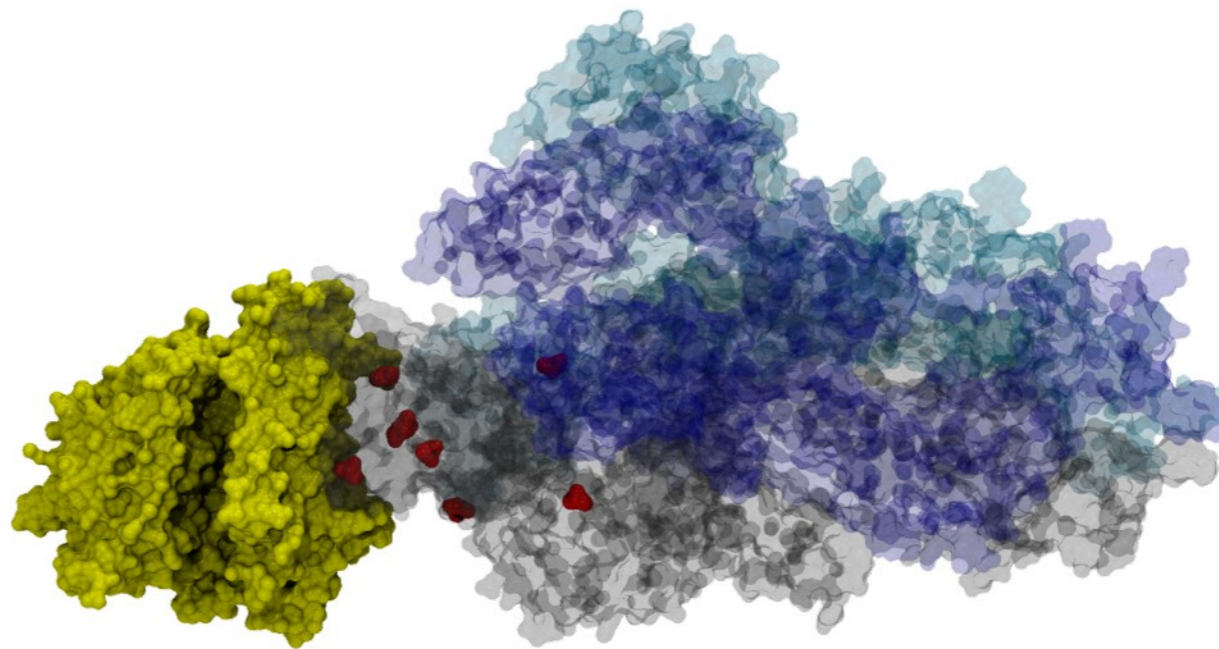

Supplement: mSphere.00160-20-sf004.pdf [file mSphere.00160-20-sf004.pdf]
